# Supplementary material for: Potential risk factors and triggers for back pain in children and young adults. A scoping review, part II: unclear or mixed types of back pain
Source: Springer Nature journal article supplement (doi:10.1186/s12998-019-0281-8), 2019-11-19
Supplement: MOESM2 [file 17406222]

**Additional file 2: PROSPECTIVE STUDIES reporting factors that are longitudinally associated with back pain.**

**Back pain, sample characteristics and associations between back pain and temporal precursor variables. Prospective Studies**

| Reference                              | Back pain |     |     |   | Characteristics of study sample | Significant positive (+) or negative (-) associations with back pain |                  |      |        |      |      |                 |                   |                       |        |                                                                                                                                                                                                                                                                                                                                                                                               |
|----------------------------------------|-----------|-----|-----|---|---------------------------------|----------------------------------------------------------------------|------------------|------|--------|------|------|-----------------|-------------------|-----------------------|--------|-----------------------------------------------------------------------------------------------------------------------------------------------------------------------------------------------------------------------------------------------------------------------------------------------------------------------------------------------------------------------------------------------|
|                                        | MBP       | LBP | Mix | ? |                                 | Clear definition of BP (x/4) (Additional file 4)                     | Age range (mean) | Sex  | Female | Male | Age  | Pubertal status | Family history BP | Socioeconomic factors | Height | History of back pain                                                                                                                                                                                                                                                                                                                                                                          |
| [10] Auvinen, (2010), Finland, 1773    |           | X   |     |   | 2/4                             | 15-16                                                                | Both             | +    |        | (NT) | (NT) | (NT)            | (NT)              | (NT)                  | (NT)   | Female: OR 1.7 (1.4-2.0) (age 16), OR 1.9 (1.6-2.3) (age 18) (calculated)                                                                                                                                                                                                                                                                                                                     |
| [11] Balague', (2010), Switzerland, 95 |           | X   |     |   | 2/4                             | 13-14 (14.0)                                                         | Male             | (NT) | (NT)   | (NT) | (NT) | +               | (NT)              | (NT)                  | (NT)   | Family history: OR 3.6 (1.3-10.2)                                                                                                                                                                                                                                                                                                                                                             |
| [4] Feldman, (2001), Canada, 502       |           | X   |     |   | 2/4                             | 13-14 (13.8)                                                         | Both             | 0    | 0      | 0    | (NT) | (NT)            | (NT)              | +                     | (NT)   | High growth spurt: OR 3.1 (1.5-6.0)                                                                                                                                                                                                                                                                                                                                                           |
| [16] Franz, (2016), Denmark, 1240      | X         | X   | X   |   | <b>4/4</b>                      | 6-12                                                                 | Both             | +    |        | (NT) | (NT) | (NT)            | (NT)              | (NT)                  | (NT)   | Incidence rate (per 1000): Girls: 0.3 (0.2-0.3), Boys: 0.1 (0.1-0.2) (OR 1.9 (1.4-2.4) (calculated))                                                                                                                                                                                                                                                                                          |
| [17] Gill, (2014), Australia, 1291     | X         | X   | X   |   | 2/4                             | (14)                                                                 | Both             | +    |        | (NT) | (NT) | (NT)            | (NT)              | (NT)                  | (NT)   | Females: (X <sup>2</sup> = 33.1, p < .001) (OR 2.4 (1.9-3.1) (calculated LBP)) (OR 2.2 (1.6-2.9) (calculated MBP))                                                                                                                                                                                                                                                                            |
| [18] Hebert, (2019), Denmark, 1021     |           |     | X   |   | <b>4/4</b>                      | (9.4)                                                                | Both             | (NT) | (NT)   | (NT) | +    | (NT)            | (NT)              | +                     | (NT)   | Spinal pain (wks), later pubertal status:<br>Tanner stage 2: IRR 1.5 (1.2-2.0)<br>Tanner stage 3: IRR 2.1 (1.5-3.1)<br>Tanner stage 4/5: IRR 3.3 (2.1-5.0)<br>Spinal pain (episodes), pubertal status:<br>Tanner stage 3: 1.4 (1.0-1.8)<br>Tanner stage 4/5: 2.1 (1.4-3.0)<br>Spinal pain (wks): linear growth: IRR 1.2 (1.2-1.2)<br>Spinal pain (episodes), linear growth: IRR 1.1 (1.1-1.2) |

| Reference                                 | Back pain |     |     |   |                                                  | Characteristics of study sample |      | Significant positive (+) or negative (-) associations with back pain |      |      |                 |                   |                       |        |                      |                                                                                   |
|-------------------------------------------|-----------|-----|-----|---|--------------------------------------------------|---------------------------------|------|----------------------------------------------------------------------|------|------|-----------------|-------------------|-----------------------|--------|----------------------|-----------------------------------------------------------------------------------|
|                                           | MBP       | LBP | Mix | ? | Clear definition of BP (x/4) (Additional file 4) | Age range (mean)                | Sex  | Female                                                               | Male | Age  | Pubertal status | Family history BP | Socioeconomic factors | Height | History of back pain | Significant estimates (95% CI)                                                    |
| [21] Hestbaek, (2006), Denmark, 9600      |           | X   |     |   | 4/4                                              | 12-22 (17.3)                    | Both | (NT)                                                                 | (NT) | (NT) | (NT)            | (NT)              | (NT)                  | (NT)   | +                    | BP in adolescence for BP in adulthood: OR 4.3 (3.5-5.4)                           |
| [22] Janssens, (2011), USA/ Denmark 4226  |           |     |     | X | 1/4                                              | 11-15 (11.6) / (13.7)           | Both | (NT)                                                                 | (NT) | (NT) | +               | (NT)              | (NT)                  | 0      | (NT)                 | Later pubertal status: OR 1.6 (1.3-2.0) (USA) OR 1.3 (1.1-1.6) (Dutch)            |
| [23] Jones, (2009), England, 178          |           | X   |     |   | 2/4                                              | 11-14                           | Both | (NT)                                                                 | (NT) | (NT) | (NT)            | (NT)              | (NT)                  | +      | (NT)                 | Shorter than median height (158cm): RR 2.1 (1.2-3.8)                              |
| [24] Jones, (2003), England, 1046         |           | X   |     |   | 2/4                                              | 11-14                           | Both | (NT)                                                                 | (NT) | (NT) | (NT)            | (NT)              | (NT)                  | 0      | (NT)                 |                                                                                   |
| [26] Kroner-Herwig, (2017), Germany, 1522 |           |     |     | X | 1/4                                              | 7-14 (13.4)                     | Both | +                                                                    |      | (NT) | (NT)            | (NT)              | (NT)                  | (NT)   | (NT)                 | Female: OR 1.6 (1.2-2.0)                                                          |
| [27] Mattila, (2008), Finland, 57408      |           | X   |     |   | 2/4                                              | 14-18 (16.6)                    | Both |                                                                      | +    | (NT) | -               | (NT)              | (NT)                  | (NT)   | (NT)                 | Males: HR 3.2 (2.7-3.7) Later pubertal status: HR 0.6 (0.5-0.8) (males)           |
| [28] Mikkonen, (2016), Finland, 1625      |           | X   |     |   | 2/4                                              | 15-16                           | Both | +                                                                    |      | (NT) | (NT)            | (NT)              | (NT)                  | (NT)   | (NT)                 | Female: Girls 44%, boys 31% (OR 1.7 (1.4-2.1) (calculated))                       |
| [29] Mikkonen, (2013), Finland, 1660      |           | X   |     |   | 2/4                                              | 15-16                           | Both | +                                                                    |      | (NT) | (NT)            | (NT)              | (NT)                  | (NT)   | (NT)                 | Female: prevalence percentage girls 61%, boys 49% (OR 1.6 (1.4-2.0) (calculated)) |

| Reference                           | Back pain |     |     |   | Characteristics of study sample | Significant positive (+) or negative (-) associations with back pain |                  |      |        |      |      |                 |                   |                       |        |                                                                                                                                                                         |
|-------------------------------------|-----------|-----|-----|---|---------------------------------|----------------------------------------------------------------------|------------------|------|--------|------|------|-----------------|-------------------|-----------------------|--------|-------------------------------------------------------------------------------------------------------------------------------------------------------------------------|
|                                     | MBP       | LBP | Mix | ? |                                 | Clear definition of BP (x/4) (Additional file 4)                     | Age range (mean) | Sex  | Female | Male | Age  | Pubertal status | Family history BP | Socioeconomic factors | Height | History of back pain                                                                                                                                                    |
| [31] Nissinen, (1994), Finland, 859 |           | X   |     |   | 2/4                             | 10-11 (10.8)                                                         | Both             | 0    | 0      | (NT) | (NT) | (NT)            | (NT)              | +                     | (NT)   | Height: OR 1.2 (1.0-1.5)                                                                                                                                                |
| [32] Sano, (2015), Japan, 4597      |           | X   |     |   | 2/4                             | 9-10                                                                 | Both             | 0    | 0      | +    | (NT) | (NT)            | (NT)              | (NT)                  | (NT)   | Age: 9 yr 10%, 14 yr 25% (OR 2.9 (2.6-3.3) (calculated)                                                                                                                 |
| [33] Sjolie, (2004), Norway, 85     |           | X   |     |   | 2/4                             | 14-16 (14.7)                                                         | Both             | (NT) | (NT)   | (NT) | (NT) | (NT)            | (NT)              | (NT)                  | +      | History of BP: OR 2.7 (1.1-7.1) (ever)<br>OR 9.1 (3.0-27.2) (>7days)                                                                                                    |
| [34] Smith, (2017), Australia, 1088 |           | X   |     |   | 3/4                             | (14)                                                                 | Both             | +    |        | (NT) | (NT) | (NT)            | +                 | (NT)                  | +      | Females: OR: 2.0 (1.2- 3.0) (no previous BP) OR 7.7 (4.7, 12.6) (previous BP)<br>Higher socioeconomic index: OR 0.8 (0.7-1.0)<br>History of BP: OR 7.7 (4.7-12.6)(girl) |
| [35] Szita, (2018), Hungary, 952    | X         | X   | X   |   | 3/4                             | 7-16 (11.0)                                                          | Both             | 0    | 0      | +    | (NT) | +               | (NT)              | (NT)                  | (NT)   | Older age: OR 1.5 (1.1-2.3)<br>Family history: OR 2.1 (1.4-3.1)                                                                                                         |
| [36] Szpalski, (2002), Belgium, 287 |           | X   |     |   | 1/4                             | 9-12                                                                 | Both             | (NT) | (NT)   | (NT) | (NT) | +               | (NT)              | (NT)                  | (NT)   | Family history: OR 2.0 (1.1-4.0)                                                                                                                                        |

Pub: Publication, (NT): Not tested, (NR): Included in study but not reported, + significant positive association, - significant negative association, 0: tested but non-significant estimate, OR: odds ratio, PR: prevalence ratio, RR: relative risk

Back pain, sample characteristics and associations between back pain and some bidirectional variables. Prospective Studies

| Reference                                  | Back Pain |     |     |   | Characteristics of study sample                  | Significant positive (+) or negative (-) associations with back pain |      |      |                 |                       |         |                        |             |            |            |       |                       |                                                                                                              |
|--------------------------------------------|-----------|-----|-----|---|--------------------------------------------------|----------------------------------------------------------------------|------|------|-----------------|-----------------------|---------|------------------------|-------------|------------|------------|-------|-----------------------|--------------------------------------------------------------------------------------------------------------|
| Reference (year of pub), country, pop size | MBP       | LBP | Mix | ? | Clear definition of BP (x/4) (Additional file 4) | Age range (mean)                                                     | Sex  | BMI  | Muscle strength | Flexibility Tightness | Posture | Physical activity/work | Screen time | Poor Sleep | Carry Bags | Smoke | Illness/ Psychosocial | Significant estimates (95% CI)                                                                               |
| [9] Aartun, (2016), Denmark, 625           | X         | X   | X   |   | 3/4                                              | 11-13                                                                | Both | (NT) | (NT)            | (NT)                  | (NT)    | 0                      | (NT)        | (NT)       | (NT)       | (NT)  | (NT)                  |                                                                                                              |
| [10] Auvinen, (2010), Finland, 1773        |           | X   |     |   | 2/4                                              | 15-16                                                                | Both | (NT) | (NT)            | (NT)                  | (NT)    | (NT)                   | (NT)        | +          | (NT)       | (NT)  | (NT)                  | Insufficient Sleep: OR 2.9 (1.7-5.2) (girls)<br>OR 2.4 (1.3-4.5) (boys)                                      |
| [11] Balague', (2010), Switzerland, 95     |           | X   |     |   | 2/4                                              | 13-14 (14.0)                                                         | Male | +    | (NT)            | (NT)                  | (NT)    | +                      | (NT)        | (NT)       | (NT)       | (NT)  | (NT)                  | Higher BMI: OR 1.3 (1.0-1.5)<br>Playing sport: OR 9.5 (1.9-48.2)                                             |
| [12] Deere, (2012), England, 3378          | X         | X   |     |   | 2/4                                              | 17 (17.8)                                                            | Both | 0    | (NT)            | (NT)                  | (NT)    | (NT)                   | (NT)        | (NT)       | (NT)       | (NT)  | (NT)                  |                                                                                                              |
| [13] Feldman, (2002), Canada, 502          |           | X   |     |   | 2/4                                              | 13-14 (13.8)                                                         | Both | (NT) | (NT)            | (NT)                  | (NT)    | +                      | (NT)        | (NT)       | (NT)       | (NT)  | (NT)                  | White collar work: OR 4.9 (1.7-14.2)                                                                         |
| [4] Feldman, (2001), Canada, 502           |           | X   |     |   | 2/4                                              | 13-14 (13.8)                                                         | Both | (NT) | (NT)            | +                     | (NT)    | 0                      | (NT)        | (NT)       | (NT)       | +     | (NT)                  | Tight hamstrings: OR 1.1 (1.0-1.1)<br>Smoking: OR 2.2 (1.4-3.5)                                              |
| [14] Feldman, (1999), Canada, 502          |           | X   |     |   | 2/4                                              | 13-14 (13.8)                                                         | Both | (NT) | (NT)            | (NT)                  | (NT)    | (NT)                   | (NT)        | (NT)       | (NT)       | +     | (NT)                  | Smoking: OR 2.4 (1.3-6.0)                                                                                    |
| [15] Franz, (2017), Denmark, 1205          | X         | X   | X   |   | <b>4/4</b>                                       | 6-12                                                                 | Both | (NT) | (NT)            | (NT)                  | (NT)    | +                      | (NT)        | (NT)       | (NT)       | (NT)  | (NT)                  | Vigorous intensity physical activity: OR 1.2 (1.0-1.4) (diagnostic spinal pain) OR 1.3 (1.0-1.5) (traumatic) |

| Reference                               | Back Pain |     |     |   | Characteristics of study sample | Significant positive (+) or negative (-) associations with back pain |                  |      |      |                 |                       |         |                        |             |            |            |           |                                                                                                                                                                                             |
|-----------------------------------------|-----------|-----|-----|---|---------------------------------|----------------------------------------------------------------------|------------------|------|------|-----------------|-----------------------|---------|------------------------|-------------|------------|------------|-----------|---------------------------------------------------------------------------------------------------------------------------------------------------------------------------------------------|
|                                         | MBP       | LBP | Mix | ? |                                 | Clear definition of BP (x/4)<br>(Additional file 4)                  | Age range (mean) | Sex  | BMI  | Muscle strength | Flexibility Tightness | Posture | Physical activity/work | Screen time | Poor Sleep | Carry Bags | Smoke     | Illness/ Psychosocial                                                                                                                                                                       |
| [16] Franz, (2016), Denmark, 1240       | X         | X   | X   |   | 4/4                             | 6-12                                                                 | Both             | (NT) | (NT) | (NT)            | (NT)                  | 0       | (NT)                   | (NT)        | (NT)       | (NT)       | (NT)      |                                                                                                                                                                                             |
| [17] Gill, (2014), Australia, 1291      | X         | X   | X   |   | 2/4                             | (14)                                                                 | Both             | (NT) | (NT) | (NT)            | (NT)                  | (NT)    | (NT)                   | (NT)        | (NT)       | +          | (NT)<br>0 | Smoking: OR 3.1 (1.1-9.2) (MB)<br>OR: 1.8 (1.2-2.8) (BP)                                                                                                                                    |
| [19] Hestbaek, (2006), Denmark, 9600    |           | X   |     |   | 4/4                             | 12-22 (17.3)                                                         | Both             | 0    | (NT) | (NT)            | (NT)                  | (NT)    | (NT)                   | (NT)        | (NT)       | +          | (NT)      | Smoking: OR 1.7 (1.4-2.1)                                                                                                                                                                   |
| [20] Hestbaek, (2006), Denmark, 9600    |           | X   |     |   | 4/4                             | 12-22 (17.3)                                                         | Both             | (NT) | (NT) | (NT)            | (NT)                  | (NT)    | (NT)                   | (NT)        | (NT)       | (NT)       | +         | Asthma: OR 1.4 (1.1-1.7) (female)<br>Headache: OR 1.6 (1.1-2.1) (female)<br>OR 2.4 (1.2-4.7) (male)                                                                                         |
| [23] Jones, (2009), England, 178        |           | X   |     |   | 2/4                             | 11-14                                                                | Both             | (NT) | (NT) | (NT)            | (NT)                  | (NT)    | (NT)                   | (NT)        | (NT)       | (NT)       | 0<br>+    | High level of peer problems: RR 2.3 (1.3-4.2)                                                                                                                                               |
| [24] Jones, (2003), England, 1046       |           | X   |     |   | 2/4                             | 11-14                                                                | Both             | 0    | (NT) | (NT)            | (NT)                  | +       | 0                      | (NT)        | 0          | (NT)       | +         | High level of sports activity (>18hr/wk): RR 1.6 (1.1-2.3)<br>Part-time work: RR 1.5 (1.1-2.1)<br>Abdominal pain: RR 1.8 (1.1-3.0)<br>High level of psychological factors: RR 1.6 (1.1-2.3) |
| [25] Kanchanomai, (2015), Thailand, 524 |           | X   |     |   | 2/4                             | 18-25 (19.4)                                                         | Both             | (NT) | (NT) | +               | +                     | (NT)    | (NT)                   | (NT)        | (NT)       | (NT)       | (NT)      | Tight quad muscle: OR 1.7 (1.1-2.8)<br>No LB support: OR 1.7 (1.2-2.6)<br>OR 2.9 (1.1-3.5) (persistent LBP)                                                                                 |

| Reference                                 | Back Pain |     |     |   |                                                  | Characteristics of study sample |      | Significant positive (+) or negative (-) associations with back pain |                 |                       |         |                        |             |            |            |       |                       |                                                                                                                |
|-------------------------------------------|-----------|-----|-----|---|--------------------------------------------------|---------------------------------|------|----------------------------------------------------------------------|-----------------|-----------------------|---------|------------------------|-------------|------------|------------|-------|-----------------------|----------------------------------------------------------------------------------------------------------------|
|                                           | MBP       | LBP | Mix | ? | Clear definition of BP (x/4) (Additional file 4) | Age range (mean)                | Sex  | BMI                                                                  | Muscle strength | Flexibility Tightness | Posture | Physical activity/work | Screen time | Poor Sleep | Carry Bags | Smoke | Illness/ Psychosocial | Significant estimates (95% CI)                                                                                 |
| [26] Kroner-Herwig, (2017), Germany, 1522 |           |     |     | X | 1/4                                              | 7-14 (13.4)                     | Both | (NT)                                                                 | (NT)            | (NT)                  | (NT)    | (NT)                   | (NT)        | (NT)       | (NT)       | (NT)  | +                     | Headache: OR 2.4 (1.8-3.1)                                                                                     |
| [27] Mattila, (2008), Finland, 57408      |           | X   |     |   | 2/4                                              | 14-18 (16.6)                    | Both | (NT)                                                                 | (NT)            | (NT)                  | (NT)    | (NT)                   | (NT)        | (NT)       | (NT)       | +     | (NT)                  | Daily smoking: HR 1.6 (1.4-1.9)                                                                                |
| [28] Mikkonen, (2016), Finland, 1625      |           | X   |     |   | 2/4                                              | 15-16                           | Both | 0                                                                    | (NT)            | (NT)                  | (NT)    | (NT)                   | (NT)        | (NT)       | (NT)       | (NT)  | (NT)                  | Externalising behaviour: RR: 1.5 (1.3-1.7) (boys)<br>RR: 1.4 (1.3-1.5) (girls)<br>RR: 3.6 (1.5-8.5) (girls 18) |
| [29] Mikkonen, (2013), Finland, 1660      |           | X   |     |   | 2/4                                              | 15-16                           | Both | +                                                                    | (NT)            | (NT)                  | (NT)    | (NT)                   | (NT)        | (NT)       | (NT)       | (NT)  | (NT)                  | BMI: RR 1.1 (1.0-1.2) (girls)<br>RR: 1.1 (1.0-1.3) (boys)                                                      |
| [30] Mikkonen, (2008), Finland, 1987      |           | X   |     |   | 2/4                                              | 15-16                           | Both | (NT)                                                                 | (NT)            | (NT)                  | (NT)    | (NT)                   | (NT)        | (NT)       | (NT)       | +     | (NT)                  | Smoking: OR 2.5 (1.4-4.5) (females)                                                                            |
| [31] Nissinen, (1994), Finland, 859       |           | X   |     |   | 2/4                                              | 10-11 (10.8)                    | Both | 0                                                                    | (NT)            | (NT)                  | (NT)    | (NT)                   | (NT)        | (NT)       | (NT)       | (NT)  | (NT)                  |                                                                                                                |
| [32] Sano, (2015), Japan, 4597            |           | X   |     |   | 2/4                                              | 9-10                            | Both | +                                                                    | (NT)            | (NT)                  | (NT)    | (NT)                   | (NT)        | (NT)       | (NT)       | (NT)  | (NT)                  | High BMI range: OR 2.9 (1.7-5.1) (9 yr)<br>OR 2.2 (1.4-3.5) (10 yr)<br>OR 1.6 (1.2-2.1) (13 yr)                |
| [33] Sjolie, (2004), Norway, 85           |           | X   |     |   | 2/4                                              | 14-16 (14.7)                    | Both | (NT)                                                                 | (NT)            | (NT)                  | +       | +                      | 0           | (NT)       | (NT)       | (NT)  | (NT)                  | Provoked by sitting: OR 3.8 (1.3-11.3)<br>Provoked by manual work: OR 9.2 (2.9-28.8)                           |

| Reference                           | Back Pain |     |     |   | Characteristics of study sample | Significant positive (+) or negative (-) associations with back pain |                  |      |      |                 |                       |         |                        |             |            |            |       |                       |                                                                                                                                                                                                                                                                                |
|-------------------------------------|-----------|-----|-----|---|---------------------------------|----------------------------------------------------------------------|------------------|------|------|-----------------|-----------------------|---------|------------------------|-------------|------------|------------|-------|-----------------------|--------------------------------------------------------------------------------------------------------------------------------------------------------------------------------------------------------------------------------------------------------------------------------|
|                                     | MBP       | LBP | Mix | ? |                                 | Clear definition of BP (x/4) (Additional file 4)                     | Age range (mean) | Sex  | BMI  | Muscle strength | Flexibility Tightness | Posture | Physical activity/work | Screen time | Poor Sleep | Carry Bags | Smoke | Illness/ Psychosocial | Significant estimates (95% CI)                                                                                                                                                                                                                                                 |
| [34] Smith, (2017), Australia, 1088 |           | X   |     |   | 3/4                             | (14)                                                                 | Both             | (NT) | +    | (NT)            | +                     | +       | (NT)                   | (NT)        | (NT)       | (NT)       | (NT)  | (NT)<br>+             | Poor back muscle endurance:<br>OR 1.9 (1.2-3.0)<br>Non-neutral standing posture:<br>OR 2.2 (1.3-3.6)<br>Increased physical activity:<br>OR 1.9 (1.2-2.8)<br>High levels of aggressive behaviour:<br>OR 1.4 (1.2-1.6)<br>High levels of somatic complaints:<br>OR 1.3 (1.1-1.5) |
| [35] Szita, (2018), Hungary, 952    | X         | X   | X   |   | 3/4                             | 7-16 (11.0)                                                          | Both             | (NT) | (NT) | (NT)            | +                     | 0       | +                      | +           | 0          | (NT)       | (NT)  |                       | Increased TV time:<br>OR 2 (1.4-2.9)<br>Uncomfortable school desk:<br>OR 6.0 (3.7-9.7)<br>Frequent sleeping problems:<br>2.2 (1.7-3.8)                                                                                                                                         |
| [36] Szpalski, (2002), Belgium, 287 |           | X   |     |   | 1/4                             | 9-12                                                                 | Both             | (NT) | (NT) | (NT)            | (NT)                  | (NT)    | (NT)                   | +           | +          | (NT)       | (NT)  |                       | Quality of sleep:<br>OR 1.2 (1.1-1.4)<br>Heavy school satchel:<br>OR 2.2 (1.0-4.8)                                                                                                                                                                                             |
| [37] Tobias, (2013), UK, 2901       | X         | X   |     |   | 3/4                             | 13 (13.8)                                                            | Both             | (NT) | (NT) | 0               | (NT)                  | (NT)    | (NT)                   | (NT)        | (NT)       | (NT)       | (NT)  | (NT)                  |                                                                                                                                                                                                                                                                                |

Pub: Publication, (NT): Not tested, (NR): Included in study but not reported, + significant positive association, - significant negative association, 0: tested but non-significant estimate, OR: odds ratio, PR: prevalence ratio, RR: relative risk
