# Supplementary material for: Potential risk factors and triggers for back pain in children and young adults. A scoping review, part II: unclear or mixed types of back pain
Source: Springer Nature journal article supplement (doi:10.1186/s12998-019-0281-8), 2019-11-19
Supplement: MOESM5 [file 17406222]

**Additional file 5: Clarity of definitions of Back pain: Cross-sectional studies**

| Ref<br>(year of pub)          | Area of BP<br>(1 point) | Recall period<br>(1 point) |              |               |              |             |              | Type<br>(1 point)                                    | Severity<br>described | Consequences reported                     | Attempted to collect valid data<br>(1 point)                                                                                            | Conclusion                      |
|-------------------------------|-------------------------|----------------------------|--------------|---------------|--------------|-------------|--------------|------------------------------------------------------|-----------------------|-------------------------------------------|-----------------------------------------------------------------------------------------------------------------------------------------|---------------------------------|
|                               | Location                | Now                        | Past<br>week | Past<br>month | Past<br>year | > 1<br>year | pain<br>ever | -1 <sup>st</sup> ever<br>-Episodic<br>-Ongoing<br>-? |                       | -Seek care<br>-Downtime<br>-Disability    |                                                                                                                                         | Clear definition of BP<br>(x/4) |
| [38] Aggarwal,<br>(2013)      | LB                      |                            | X            | X             | X            |             |              | -<br>-<br>-<br>-?                                    | Yes                   | -<br>- Downtime<br>- Disability           | Questionnaire based on<br>previous guidelines, pretested<br>in pilot study.                                                             | 3/4                             |
| [39] Andersen,<br>(2006)      | LB,<br>MB,              | X                          |              | X             |              |             | X            | -<br>-<br>-<br>-?                                    | No                    | - Seek care<br>- Downtime<br>-            | NR                                                                                                                                      | 2/4                             |
| [40] Balague',<br>(1994)      | LB                      | ?                          | ?            | ?             | ?            | ?           | ?            | -<br>-<br>-<br>-?                                    | No                    | -<br>-<br>-                               | NR                                                                                                                                      | 1/4                             |
| [41] Bejia,<br>(2005)         | LB                      |                            | X            | X             | X            |             |              | -<br>-Episodic<br>-Ongoing<br>-                      | No                    | -Seek care<br>-Downtime<br>-Disability    | Used pre-validated<br>questionnaire (kappa: 0.7-1.0)<br>Used diagrams                                                                   | <b>4/4</b>                      |
| [42] Cakmak,<br>(2004)        | LB                      |                            |              | X             |              |             | X            | -<br>-<br>-<br>-?                                    | Yes                   | -<br>-<br>- Disability                    | Pilot study of questionnaire: ICC<br>+1 (perfect agreement)                                                                             | 3/4                             |
| [43] Dianat,<br>(2017)        | LB                      |                            |              | X             |              |             |              | -<br>-<br>-<br>-?                                    | Yes                   | - Seek care<br>- Downtime<br>- Disability | Pilot study on questionnaire<br>prior. Test-retest stability<br>kappa: 0.72-0.96)<br>Used diagrams                                      | 3/4                             |
| [44] Dianat,<br>(2014)        | LB                      |                            |              | X             |              |             |              | -<br>-<br>-<br>-?                                    | No                    | -<br>-<br>-                               | Modified pre-validated<br>questionnaire. Pilot study on<br>questionnaire. Test-retest: phi<br>coefficients: 0.72-0.91)<br>Used diagrams | 3/4                             |
| [45]<br>Diepenmaat,<br>(2006) | LB                      |                            |              | X             |              |             |              | -<br>-<br>-<br>-?                                    | No                    | -<br>-<br>-                               | Used diagram                                                                                                                            | 2/4                             |

| Ref<br>(year of pub)         | Area of BP<br>(1 point) | Recall period<br>(1 point) |              |               |              |             |              | Type<br>(1 point)                                    | Severity<br>described | Consequences reported                  | Attempted to collect valid data<br>(1 point)             | Conclusion                      |
|------------------------------|-------------------------|----------------------------|--------------|---------------|--------------|-------------|--------------|------------------------------------------------------|-----------------------|----------------------------------------|----------------------------------------------------------|---------------------------------|
|                              | Location                | Now                        | Past<br>week | Past<br>month | Past<br>year | > 1<br>year | pain<br>ever | -1 <sup>st</sup> ever<br>-Episodic<br>-Ongoing<br>-? |                       | -Seek care<br>-Downtime<br>-Disability |                                                          | Clear definition of BP<br>(x/4) |
| [46] Erne,<br>(2011)         | LB                      |                            |              | X             |              |             |              | -<br>-<br>-<br>-?                                    | No                    | -<br>-<br>-                            | Used diagram                                             | 2/4                             |
| [47]<br>Fernandes,<br>(2015) | LB                      |                            |              |               | X            |             |              | -<br>-<br>-<br>-?                                    | No                    | -<br>-<br>-                            | Adapted a pre-validated<br>questionnaire<br>Used diagram | 3/4                             |
| [48] Ganesan,<br>(2017)      | LB                      | ?                          | ?            | ?             | ?            | ?           | ?            | -<br>-<br>-<br>-?                                    | Yes                   | -<br>-<br>-<br>- Disability            | NR                                                       | 1/4                             |
| [49]<br>Ghandour,<br>(2004)  | ?                       |                            | X            | X             |              |             |              | -<br>-Episodic<br>-Ongoing<br>-                      | No                    | -<br>-<br>-                            | NR                                                       | 2/4                             |
| [50] Gilkey,<br>(2010)       | ?                       |                            |              |               | X            |             |              | -<br>-<br>-<br>-?                                    | No                    | - Seek care<br>-<br>-                  | NR                                                       | 1/4                             |
| [51] Graup,<br>(2014)        | LB                      |                            |              |               |              |             | X            | -<br>-<br>-<br>-?                                    | No                    | -<br>-<br>-                            | Diagrams used                                            | 2/4                             |
| [52]<br>Gunzburg,<br>(1999), | LB                      |                            |              |               |              |             | X            | -<br>-<br>-<br>-?                                    | Yes                   | - Seek care<br>-Downtime<br>-          | NR                                                       | 2/4                             |
| [53] Haag,<br>(2016)         | Mix                     |                            |              |               | X            |             |              | -<br>-<br>-<br>-?                                    | Yes                   | -<br>-<br>-                            | Stated used a validated<br>questionnaire, diagram used   | 3/4                             |
| [54] Harreby,<br>(1999)      | LB                      | X                          | X            | X             | X            |             | X            | -<br>-Episodic<br>-Ongoing<br>-                      | Yes                   | -Seek care<br>-Downtime<br>-Disability | Pilot study on questionnaire.<br>Diagram used            | 4/4                             |

| Ref<br>(year of pub)               | Area of BP<br>(1 point) | Recall period<br>(1 point) |              |               |              |             |              | Type<br>(1 point)                                    | Severity<br>described | Consequences reported                  | Attempted to collect valid data<br>(1 point)                                   | Conclusion                      |
|------------------------------------|-------------------------|----------------------------|--------------|---------------|--------------|-------------|--------------|------------------------------------------------------|-----------------------|----------------------------------------|--------------------------------------------------------------------------------|---------------------------------|
|                                    | Location                | Now                        | Past<br>week | Past<br>month | Past<br>year | > 1<br>year | pain<br>ever | -1 <sup>st</sup> ever<br>-Episodic<br>-Ongoing<br>-? |                       | -Seek care<br>-Downtime<br>-Disability |                                                                                | Clear definition of BP<br>(x/4) |
| [55] Hestbaek,<br>(2008)           | LB                      |                            |              |               | X            |             |              | -<br>-<br>-<br>-?                                    | No                    | -<br>-<br>-                            | Used a pre-validated<br>questionnaire                                          | 3/4                             |
| [56] Hulsegge,<br>(2011)           | ?                       |                            |              |               | X            |             |              | -<br>-<br>-<br>-?                                    | No                    | -Seek care<br>-<br>-                   | NR                                                                             | 1/4                             |
| [57] Jones,<br>(2004)              | LB                      |                            |              | X             |              |             |              | -<br>-<br>-<br>-?                                    | No                    | -<br>-<br>-                            | Diagrams used                                                                  | 2/4                             |
| [58] Kaspiris,<br>(2010)           | LB                      |                            |              |               | X            |             |              | -<br>-<br>-<br>-?                                    | Yes                   | -<br>-<br>-Disability                  | Used a pre-validated<br>questionnaire, diagrams used                           | 3/4                             |
| [59] Kovacs,<br>(2003)             | LB                      |                            | X            |               |              |             | X            | -<br>-<br>-<br>-?                                    | No                    | -Seek care<br>-Downtime<br>-Disability | Use a pre-validated<br>questionnaire                                           | 3/4                             |
| [60]<br>Kristensen,<br>(2001)      | LB                      |                            |              |               | X            |             | X            | -<br>-<br>-<br>-?                                    | No                    | -Seek care<br>-Downtime<br>-Disability | Use pre-validated<br>questionnaire, piloted the<br>questionnaire, used diagram | 3/4                             |
| [61]<br>Kristjansdottir,<br>(2002) | ?                       | ?                          | ?            | ?             | ?            | ?           | ?            | -<br>-<br>-<br>-?                                    | No                    | -<br>-<br>-                            | NR                                                                             | 0/4                             |
| [62] Leboeuf-<br>Yde,<br>(2002),   | Mix                     | X                          | X            | X             |              |             |              | -<br>-<br>-<br>-?                                    | No                    | -Seek care<br>-Downtime<br>-Disability | NR                                                                             | 3/4                             |
| [63] LeResche,<br>(2005)           | ?                       |                            |              | X (3 mth)     |              |             |              | -<br>-<br>-<br>-?                                    | Yes                   | -<br>-<br>-                            | NR                                                                             | 1/4                             |

| Ref<br>(year of pub)                 | Area of BP<br>(1 point) | Recall period<br>(1 point) |              |               |              |             |              | Type<br>(1 point)                                    | Severity<br>described | Consequences reported                  | Attempted to collect valid data<br>(1 point)       | Conclusion                      |
|--------------------------------------|-------------------------|----------------------------|--------------|---------------|--------------|-------------|--------------|------------------------------------------------------|-----------------------|----------------------------------------|----------------------------------------------------|---------------------------------|
|                                      | Location                | Now                        | Past<br>week | Past<br>month | Past<br>year | > 1<br>year | pain<br>ever | -1 <sup>st</sup> ever<br>-Episodic<br>-Ongoing<br>-? |                       | -Seek care<br>-Downtime<br>-Disability |                                                    | Clear definition of BP<br>(x/4) |
| [64] Masiero,<br>(2008)              | LB                      |                            |              |               | X            |             |              | -<br>-<br>-<br>-?                                    | Yes                   | -Seek care<br>-<br>-                   | Assessed for comprehensibility<br>in a pilot study | 3/4                             |
| [65] Mattila,<br>(2008)              | LB                      |                            |              |               |              |             | X            | -<br>-<br>-<br>-?                                    | No                    | -Seek care<br>-<br>-                   | NR                                                 | 2/4                             |
| [66] Minghelli,<br>(2014)            | LB                      | X                          |              |               | X            |             | X            | -<br>-<br>-<br>-?                                    | No                    | -<br>-<br>-                            | Used a pre-validated<br>questionnaire              | 3/4                             |
| [67] Mohseni-<br>Bandpei,<br>(2007), | LB                      | X                          |              | X             | X            |             |              | -<br>-<br>-<br>-?                                    | No                    | -<br>-<br>-                            | NR                                                 | 2/4                             |
| [68] Ng,<br>(2014)                   | LB                      | X                          | X            |               |              |             | X            | -<br>-<br>-<br>-?                                    | Yes                   | -<br>-<br>-                            | Diagram used                                       | 2/4                             |
| [69] Noll,<br>(2016)                 | ?                       |                            |              | X (3 mth)     |              |             |              | -<br>-<br>-<br>-?                                    | No                    | -<br>-<br>-                            | Used a pre-validated<br>questionnaire              | 2/4                             |
| [70] Noll,<br>(2016)                 | ?                       |                            |              | X (3 mth)     |              |             |              | -<br>-<br>-<br>-?                                    | No                    | -<br>-<br>-                            | Used a pre-validated<br>questionnaire              | 2/4                             |
| [71] Onofrio,<br>(2012)              | LB                      |                            |              | X             |              |             |              | -<br>-<br>-<br>-?                                    | No                    | -<br>-<br>-                            | Pilot study of questionnaire,<br>diagram used      | 3/4                             |
| [72] Pasanen,<br>(2016)              | LB                      |                            | X            |               | X            |             |              | -<br>-<br>-<br>-?                                    | No                    | -Seek care<br>-Downtime<br>-Disability | Used pre-validated<br>questionnaire                | 3/4                             |

| Ref<br>(year of pub)                    | Area of BP<br>(1 point) | Recall period<br>(1 point) |              |               |              |             |              | Type<br>(1 point)                                    | Severity<br>described | Consequences reported                  | Attempted to collect valid data<br>(1 point)                  | Conclusion                             |
|-----------------------------------------|-------------------------|----------------------------|--------------|---------------|--------------|-------------|--------------|------------------------------------------------------|-----------------------|----------------------------------------|---------------------------------------------------------------|----------------------------------------|
|                                         | Location                | Now                        | Past<br>week | Past<br>month | Past<br>year | > 1<br>year | pain<br>ever | -1 <sup>st</sup> ever<br>-Episodic<br>-Ongoing<br>-? |                       |                                        |                                                               | -Seek care<br>-Downtime<br>-Disability |
| [73] Prista,<br>(2004)                  | LB                      |                            |              | X             | X            |             | X            | -<br>-Episodic<br>-<br>-                             | No                    | -Seek care<br>-<br>-                   | NR                                                            | 3/4                                    |
| [74]<br>Rodrigues-<br>Oviedo,<br>(2012) | ?                       |                            |              |               | X            |             |              | -<br>-<br>-<br>-?                                    | No                    | -<br>-<br>-                            | NR                                                            | 1/4                                    |
| [75]<br>Scarabottolo,<br>(2017)         | LB                      |                            | X            |               |              |             |              | -<br>-<br>-<br>-?                                    | No                    | -<br>-<br>-                            | Used a pre-validated<br>questionnaire, (kappa: 0.57-<br>1.00) | 3/4                                    |
| [76] Shehab,<br>(2004)                  | LB                      | ?                          | ?            | ?             | ?            | ?           | ?            | -<br>-<br>-?                                         | Yes                   | -<br>-<br>-Disability                  | Questionnaire was pre-tested.<br>Diagrams used.               | 2/4                                    |
| [77] Sheir-<br>Neiss<br>(2003)          | ?                       |                            |              | X             |              |             |              | -<br>-<br>-<br>-?                                    | Yes                   | -Seek care<br>-Downtime<br>-Disability | Adapted a pre-validated<br>questionnaire. Diagrams used.      | 2/4                                    |
| [78] Shipp,<br>(2007)                   | ?                       |                            |              | X (9 mth)     |              |             |              | -<br>-<br>-?                                         | No                    | -Seek care<br>-Downtime<br>-Disability | Pre-validated questionnaire<br>used. Diagram used.            | 3/4                                    |
| [79] Silva,<br>(2016)                   | MB/LB                   |                            |              | X (6 mth)     |              |             |              | -<br>-<br>-<br>-?                                    | No                    | -Seek care<br>-<br>-                   | Diagrams used. Use a pre-<br>validated questionnaire.         | 3/4                                    |
| [80] Silva,<br>(2014)                   | LBP                     |                            |              |               | X            |             |              | -<br>-<br>-<br>-?                                    | No                    | -<br>-<br>-                            | Use a pre-validated<br>questionnaire. Diagrams used.          | 3/4                                    |
| [81] Skaggs,<br>(2006)                  | ?                       | ?                          | ?            | ?             | ?            | ?           | ?            | -<br>-<br>-<br>-?                                    | Yes                   | -Seek care<br>-<br>-Disability         | Use a pre-validated<br>questionnaire                          | 1/4                                    |

| Ref<br>(year of pub)          | Area of BP<br>(1 point)<br>Location | Recall period<br>(1 point) |              |               |              |             |              | Type<br>(1 point)<br>-1 <sup>st</sup> ever<br>-Episodic<br>-Ongoing<br>-? | Severity<br>described | Consequences reported<br>-Seek care<br>-Downtime<br>-Disability | Attempted to collect valid data<br>(1 point)          | Conclusion<br>Clear definition of BP<br>(x/4) |
|-------------------------------|-------------------------------------|----------------------------|--------------|---------------|--------------|-------------|--------------|---------------------------------------------------------------------------|-----------------------|-----------------------------------------------------------------|-------------------------------------------------------|-----------------------------------------------|
|                               |                                     | Now                        | Past<br>week | Past<br>month | Past<br>year | > 1<br>year | pain<br>ever |                                                                           |                       |                                                                 |                                                       |                                               |
| [82] Turk,<br>(2011)          | LB                                  |                            |              | X (3 mth)     |              |             |              | -<br>-<br>-<br>-?                                                         | Yes                   | -Seek care<br>-<br>-Disability                                  | NR                                                    | 2/4                                           |
| [83] Van Gent,<br>(2003)      | ?                                   | ?                          | ?            | ?             | ?            | ?           | ?            | -<br>-<br>-<br>-?                                                         | No                    | -Seek care<br>-<br>-Disability                                  | NR                                                    | 0/4                                           |
| [84] Viry,<br>(1999)          | ?                                   | X                          |              |               |              |             | X            | -<br>-Episodic<br>-Ongoing<br>-                                           | No                    | -Seek care<br>-Downtime<br>-                                    | NR                                                    | 2/4                                           |
| [85] Watson,<br>(2003)        | LB                                  |                            |              | X             |              |             |              | -<br>-<br>-<br>-?                                                         | No                    | -<br>-<br>-                                                     | Piloted questionnaire. Used<br>diagram                | 3/4                                           |
| [86]<br>Wedderkopp,<br>(2005) | MB/LB                               | X                          | X            | X             |              |             |              | -<br>-<br>-<br>-?                                                         | No                    | -Seek care<br>-Downtime<br>-                                    | Pilot study used for<br>questionnaire, diagrams used. | 3/4                                           |
| [87]<br>Wedderkopp,<br>(2001) | MB/LB                               | x                          | x            | x             |              |             |              | -<br>-<br>-<br>-?                                                         | No                    | -Seek care<br>-Downtime<br>-                                    | Pilot study used for<br>questionnaire, diagrams used. | 3/4                                           |
| [88] Wirth,<br>(2015)         | MB/LB                               |                            |              | X             |              |             | X            | -<br>-Episodic<br>-Ongoing<br>-                                           | yes                   | -Seek care<br>-Downtime<br>-Disability                          | Diagram used                                          | 3/4                                           |
| [89] Wirth,<br>(2013)         | MB/LB                               |                            |              | X             |              |             | X            | -<br>-Episodic<br>-Ongoing<br>-                                           | Yes                   | -Seek care<br>-Downtime<br>-Disability                          | NR                                                    | 3/4                                           |

| Ref<br>(year of pub) | Area of BP<br>(1 point) | Recall period<br>(1 point) |              |               |              |             |              | Type<br>(1 point) | Severity<br>described | Consequences reported | Attempted to collect valid data<br>(1 point)                               | Conclusion |
|----------------------|-------------------------|----------------------------|--------------|---------------|--------------|-------------|--------------|-------------------|-----------------------|-----------------------|----------------------------------------------------------------------------|------------|
|                      |                         | Now                        | Past<br>week | Past<br>month | Past<br>year | > 1<br>year | pain<br>ever |                   |                       |                       |                                                                            |            |
| [90] Yao,<br>(2012)  | LB                      |                            |              | X (3 mth)     |              |             |              | -<br>-<br>-<br>-? | No                    | -<br>-<br>-           | Pilot study used for<br>questionnaire, test=retest<br>coefficient 0.5-0.8) | 3/4        |

BP: back pain, LB: low back, MB: mid back, NR: not reported,
