# Supplementary material for: Potential risk factors and triggers for back pain in children and young adults. A scoping review, part II: unclear or mixed types of back pain
Source: Chiropr Man Therap. 2019 Nov 19;27:61. doi: 10.1186/s12998-019-0281-8 (PMC6862810; doi:10.1186/s12998-019-0281-8)
Supplement: Supplementary file 3 — Additional file 3. CROSS-SECTIONAL STUDIES reporting factors that are associated with back pain. Table summarising included cross-sectional study. [file 12998_2019_281_MOESM3_ESM.pdf]

### Additional file 3: CROSS-SECTIONAL STUDIES reporting factors that are associated with back pain.

Back pain, sample characteristics and associations between back pain and temporal precursor variables. Cross-sectional studies

| Reference                                   | Back pain |     |     |   |                                                  | Characteristics of study sample |      | Significant positive (+) or negative (-) associations with back pain |      |      |                 |                   |                       |        |                                                                                                                                                                    |
|---------------------------------------------|-----------|-----|-----|---|--------------------------------------------------|---------------------------------|------|----------------------------------------------------------------------|------|------|-----------------|-------------------|-----------------------|--------|--------------------------------------------------------------------------------------------------------------------------------------------------------------------|
| Reference, (year of pub), country, pop size | MBP       | LBP | Mix | ? | Clear definition of BP (x/4) (Additional file 5) | Age range (mean)                | Sex  | Female                                                               | Male | Age  | Pubertal status | Family history BP | Socioeconomic factors | Height | Significant estimates (95% CI)                                                                                                                                     |
| [38] Aggarwal, (2013)<br>India, 160         |           | X   |     |   | 3/4                                              | 17-25                           | Both | (NT)                                                                 | (NT) | (NT) | (NT)            | +                 | (NT)                  | (NT)   | Family history: OR 2.6 (1.4-5.9)                                                                                                                                   |
| [39] Andersen, (2006),<br>Denmark, 9413     |           |     | X   |   | 2/4                                              | (17)                            | Both | +                                                                    |      | (NT) | (NT)            | (NT)              | (NT)                  | (NT)   | Female: OR 1.7 (1.5-2.0)                                                                                                                                           |
| [40] Balague', (1994),<br>Switzerland, 1755 |           | X   |     |   | 1/4                                              | 8-16                            | Both | (NT)                                                                 | (NT) | (NT) | (NT)            | +                 | (NT)                  | (NT)   | Family history: OR 2.1                                                                                                                                             |
| [41] Bejia, (2005),<br>Tunisia, 622         |           | X   |     |   | 4/4                                              | 11-19                           | Both | 0                                                                    | 0    | 0    | (NT)            | +                 | (NT)                  | 0      | Family history: OR 3.8 (2.9-5.9)                                                                                                                                   |
| [42] Cakmak, (2004),<br>Turkey, 1527        |           | X   |     |   | 3/4                                              | 17-26                           | Both | +                                                                    |      | +    | (NT)            | (NT)              | (NT)                  | (NT)   | Female OR: 1.3 (1.4-3.3)<br>Age: 17 yr: OR 1 (index)<br>21 yr OR: 2.2 ( 1.2-4.2)<br>23 yr OR: 3.2 (1.7-6.2)<br>24 yr OR: 2.8 (1.5-5.3)<br>25+ yr OR: 3.1 (1.4-6.7) |
| [43] Dianat, (2017),<br>Iran, 1611          |           | X   |     |   | 3/4                                              | 11-14                           | Both | +                                                                    |      | 0    | (NT)            | +                 | (NT)                  | (NT)   | Female: OR 1.5 (1.2–1.8)<br>Family History: OR 1.8 (1.4–2.4)                                                                                                       |
| [44] Dianat, (2014),<br>Iran, 586           |           | X   |     |   | 3/4                                              | 12-14                           | Both | +                                                                    |      | 0    | (NT)            | (NT)              | (NT)                  | (NT)   | Female: OR 2.2 (1.4-3.3)                                                                                                                                           |

| Reference                                   | Back pain |     |     |   | Characteristics of study sample                  | Significant positive (+) or negative (-) associations with back pain |      |        |      |      |                 |                   |                       |        |                                                                                       |
|---------------------------------------------|-----------|-----|-----|---|--------------------------------------------------|----------------------------------------------------------------------|------|--------|------|------|-----------------|-------------------|-----------------------|--------|---------------------------------------------------------------------------------------|
| Reference, (year of pub), country, pop size | MBP       | LBP | Mix | ? | Clear definition of BP (x/4) (Additional file 5) | Age range (mean)                                                     | Sex  | Female | Male | Age  | Pubertal status | Family history BP | Socioeconomic factors | Height | Significant estimates (95% CI)                                                        |
| [45] Diepenmaat, (2006), Netherlands, 3485  |           | X   |     |   | 2/4                                              | 12-16                                                                | Both | +      |      | (NT) | (NT)            | (NT)              | (NT)                  | (NT)   | Female: OR 1.5 (1.1-1.9)                                                              |
| [46] Erne, (2011), Switzerland, 189         |           | X   |     |   | 2/4                                              | 10-13                                                                | Both | 0      | 0    | +    | (NT)            | 0                 | (NT)                  | (NT)   | Younger age: OR 0.2 (0.1-0.6)                                                         |
| [47] Fernandes, (2015), Brazil, 1461        |           | X   |     |   | 3/4                                              | 10-14                                                                | Both | +      |      | +    | (NT)            | (NT)              | (NT)                  | (NT)   | Female: OR 1.5 (1.1-1.9)<br>Age: 10-11 yr: OR 1 (index)<br>12-14 yr: OR 1.1 (1.1-1.3) |
| [48] Ganesan, (2017), India, 1355           |           | X   |     |   | 1/4                                              | 20-29                                                                | Both | 0      | 0    | 0    | (NT)            | +                 | (NT)                  | (NT)   | Family history: Standard error 0.2 (1.4, 2.7)<br>(OR 1.5 (1.1-1.9) calculated)        |
| [49] Ghandour, (2004), USA, 8350            |           |     |     | X | 2/4                                              | 11-19                                                                | Both | NR     | NR   | NR   | (NT)            | (NT)              | 0                     | (NT)   |                                                                                       |
| [50] Gilkey, (2010), USA, 963               |           |     |     | X | 1/4                                              | 18-22                                                                | Both | -      |      | 0    | (NT)            | (NT)              | 0                     | 0      | Female: OR 0.6 (0.4-0.8)                                                              |
| [51] Graup, (2014), Brazil, 1455            |           | X   |     |   | 2/4                                              | 10-17                                                                | Both | +      |      | +    | (NT)            | (NT)              | 0                     | (NT)   | Female: OR 2.4 (1.7-3.3)<br>Older age: OR 1.1 (1.1-1.2)                               |
| [52] Gunzburg, (1999), Belgium, 392         |           | X   |     |   | 2/4                                              | 8-11                                                                 | Both | 0      | 0    | (NT) | (NT)            | (NT)              | (NT)                  | (NT)   |                                                                                       |

| Reference                                   | Back pain |     |     |   | Characteristics of study sample                  | Significant positive (+) or negative (-) associations with back pain |      |        |      |      |                 |                   |                       |        |                                                                                                                 |
|---------------------------------------------|-----------|-----|-----|---|--------------------------------------------------|----------------------------------------------------------------------|------|--------|------|------|-----------------|-------------------|-----------------------|--------|-----------------------------------------------------------------------------------------------------------------|
| Reference, (year of pub), country, pop size | MBP       | LBP | Mix | ? | Clear definition of BP (x/4) (Additional file 5) | Age range (mean)                                                     | Sex  | Female | Male | Age  | Pubertal status | Family history BP | Socioeconomic factors | Height | Significant estimates (95% CI)                                                                                  |
| [53] Haag, (2016), New Zealand, 1110        |           |     | X   |   | 3/4                                              | 15-19                                                                | Both | +      |      | +    | (NT)            | (NT)              | (NT)                  | (NT)   | Female: OR 1.5 (1.0-2.1)<br>Age 15 yr: OR 1 (index)<br>16/17 yr OR 1.7 (1.2-2.3)<br>18/19 yr: OR 1..8 (1.2-2.8) |
| [54] Harreby, (1999), Denmark, 1389         |           | X   |     |   | 4/4                                              | 13-16                                                                | Both | +      |      | +    | (NT)            | (NT)              | (NT)                  | (NT)   | Female: OR 2.1 (1.6-2.9)<br>Older age 14 to 15 yr: 6.4%                                                         |
| [55] Hestbaek, (2008), Denmark, 4771        |           | X   |     |   | 3/4                                              | 12-18                                                                | Both | (NT)   | (NT) | (NT) | (NT)            | (NT)              | +                     | (NT)   | Higher social class: OR 0.9 (0.8-0.9)                                                                           |
| [56] Hulsege, (2011), Netherlands, 2638     |           |     |     | X | 1/4                                              | 10-12                                                                | Both | (NT)   | (NT) | (NT) | 0               | (NT)              | 0                     | 0      |                                                                                                                 |
| [57] Jones, (2004), England, 1326           |           | X   |     |   | 2/4                                              | 12-15                                                                | Both | (NT)   | (NT) | (NT) | (NT)            | 0                 | (NT)                  | (NT)   |                                                                                                                 |
| [58] Kaspiris, (2010), Greece, 153          |           | X   |     |   | 3/4                                              | 7-14                                                                 | Both | +      |      | +    | (NT)            | +                 | (NT)                  | +      | Female: OR 1.4 (1.0-2.1) (calculated)<br>Older age: OR 1.2<br>Family history: OR 1.7                            |
| [59] Kovacs, (2003), Spain, 7048            |           | X   |     |   | 3/4                                              | 13-15                                                                | Both | +      |      | (NT) | (NT)            | (NT)              | (NT)                  | (NT)   | Female: OR 1.1 (1.1-1.2)                                                                                        |
| [60] Kristensen, (2001), Norway, 190        |           | X   |     |   | 3/4                                              | (15)                                                                 | Both | (NT)   | (NT) | (NT) | (NT)            | 0                 | (NT)                  | (NT)   |                                                                                                                 |

| Reference                                   | Back pain |     |     |   |                                                  | Characteristics of study sample | Significant positive (+) or negative (-) associations with back pain |        |      |      |                 |                   |                       |        |                                                                                                                                                               |
|---------------------------------------------|-----------|-----|-----|---|--------------------------------------------------|---------------------------------|----------------------------------------------------------------------|--------|------|------|-----------------|-------------------|-----------------------|--------|---------------------------------------------------------------------------------------------------------------------------------------------------------------|
| Reference, (year of pub), country, pop size | MBP       | LBP | Mix | ? | Clear definition of BP (x/4) (Additional file 5) | Age range (mean)                | Sex                                                                  | Female | Male | Age  | Pubertal status | Family history BP | Socioeconomic factors | Height | Significant estimates (95% CI)                                                                                                                                |
| [61] Kristjansdottir, (2002), Iceland, 2173 |           |     |     | X | 0/4                                              | 11-16                           | Both                                                                 | 0      | 0    | +    | (NT)            | (NT)              | 0                     | (NT)   | Older age: r 0.2                                                                                                                                              |
| [62] Leboeuf-Yde, (2002), Denmark, 806      |           |     | X   |   | 3/4                                              | 8-16                            | Both                                                                 | (NT)   | (NT) | (NT) | (NT)            | (NT)              | + 0                   | (NT)   | Children parental low level of education: OR 1.8 (1.1-2.0) (no significant association in adolescence)                                                        |
| [63] LeResche, (2005), USA, 3101            |           |     |     | X | 1/4                                              | 11-17                           | Both                                                                 | 0      | 0    | (NT) | +               | (NT)              | (NT)                  | (NT)   | Later pubertal status: OR 2.0 (girls) OR 1.9 (boys)                                                                                                           |
| [64] Masiero, (2008), Italy, 7542           |           | X   |     |   | 3/4                                              | 13-16                           | Both                                                                 | +      |      | (NT) | (NT)            | +                 | (NT)                  | (NT)   | Female: OR 1.9 (1.7-2.2) Family history: OR 1.8 (1.5-2.0)                                                                                                     |
| [65] Mattila, (2008), Finland, 7040         |           | X   |     |   | 2/4                                              | 18-29                           | Males                                                                | (NT)   | (NT) | +    | (NT)            | (NT)              | (NT)                  | (NT)   | Age 17/18 yr: OR: 1 (index) 21+ yr: OR 1.6 (1.2-2.1)                                                                                                          |
| [66] Minghelli, (2014), Portugal, 966       |           | X   |     |   | 3/4                                              | 10-16                           | Both                                                                 | +      |      | +    | (NT)            | (NT)              | (NT)                  | (NT)   | Females: OR 2.1 (1.6-2.7) Age 10-12 yr: OR 1 (index) 13-16 yr: 1.5 (1.2-2.0)                                                                                  |
| [67] Mohseni-Bandpei, (2007), Iran, 4813    |           | X   |     |   | 2/4                                              | 11-14                           | Both                                                                 | 0      | 0    | -    | (NT)            | (NT)              | (NT)                  | (NT)   | Age: OR 0.5 (0.4-0.6)                                                                                                                                         |
| [68] Ng, (2014), Australia, 265             |           | X   |     |   | 2/4                                              | 14-16                           | Both                                                                 |        | +    | (NT) | (NT)            | (NT)              | (NT)                  | (NT)   | Prevalence percentage Male: Lifetime 94%, point 65% Female: Lifetime 78%, point 53% (Females: Lifetime: OR 0.2 (0.1-0.5), point: OR 0.3 (0.2-0.5) calculated) |

| Reference                                   | Back pain |     |     |   |                                                  | Characteristics of study sample | Significant positive (+) or negative (-) associations with back pain |        |      |      |                 |                   |                       |        |                                                                                                                                                    |
|---------------------------------------------|-----------|-----|-----|---|--------------------------------------------------|---------------------------------|----------------------------------------------------------------------|--------|------|------|-----------------|-------------------|-----------------------|--------|----------------------------------------------------------------------------------------------------------------------------------------------------|
| Reference, (year of pub), country, pop size | MBP       | LBP | Mix | ? | Clear definition of BP (x/4) (Additional file 5) | Age range (mean)                | Sex                                                                  | Female | Male | Age  | Pubertal status | Family history BP | Socioeconomic factors | Height | Significant estimates (95% CI)                                                                                                                     |
| [69] Noll, (2016), Brazil, 1597             |           |     |     | X | 2/4                                              | 11-16                           | Both                                                                 | +      |      | 0    | (NT)            | +                 | 0                     | (NT)   | Female: PR 1.1 (1.1-1.2)<br>Family history: PR 1.2 (1.2-1.3)                                                                                       |
| [70] Noll, (2016), Brazil, 361              |           |     |     | X | 2/4                                              | 14-20                           | Both                                                                 | +      |      | 0    | (NT)            | +                 | +                     | (NT)   | Female: PR 1.2 (1.1-1.3)<br>Family history: PR 1.2 (1.1-1.3)<br>Ethnicity: White: PR: 1<br>Asian: PR 1.2 (1.1-1.4)<br>Indigenous: PR 1.4 (1.3-1.5) |
| [71] Onofrio, (2012), Brazil, 1233          |           | X   |     |   | 3/4                                              | 13-19                           | Both                                                                 | 0      | 0    | 0    | (NT)            | (NT)              | +                     | (NT)   | Non-white: PR 1.4 (1.0-1.9)                                                                                                                        |
| [72] Pasanen, (2016), Finland, 401          |           | X   |     |   | 3/4                                              | 13-17                           | Both                                                                 | 0      | 0    | +    | (NT)            | +                 | (NT)                  | (NT)   | Age (per year): OR 1.2 (1.1-1.4)<br>Family history: OR 2.0 (1.2-3.3)                                                                               |
| [73] Prista, (2004), Mozambique, 204        |           | X   |     |   | 3/4                                              | 11-16                           | Both                                                                 | 0      | 0    | 0    | (NT)            | (NT)              | +                     | (NT)   | Living in peripheral centre: OR 1<br>Living in wealthier urban centre<br>OR: 3.1                                                                   |
| [74] Rodrigues-Oviedo, (2012), Spain, 1403  |           |     |     | X | 1/4                                              | 12-17                           | Both                                                                 | +      |      | +    | (NT)            | (NT)              | (NT)                  | (NT)   | Female: OR 1.6 (1.3-2.1)<br>Older age: OR 1.2 (1.1-1.3)                                                                                            |
| [75] Scarabottolo, (2017), Brazil, 1011     |           | X   |     |   | 3/4                                              | 10-17                           | Both                                                                 | 0      | 0    | +    | (NT)            | (NT)              | 0                     | (NT)   | Older age: older 25.1%, younger adolescents 12.4%                                                                                                  |
| [76] Shehab, (2004), Kuwait, 400            |           | X   |     |   | 2/4                                              | 10-18                           | Both                                                                 | +      |      | (NT) | (NT)            | (NT)              | (NT)                  | (NT)   | Female: prevalence percentage 64.7%<br>males: prevalence percentage 50.8%<br>(Females: OR: 1.8 (1.2-2.7) calculated)                               |

[illegible]

| Reference                                   | Back pain |     |     |   |                                                  | Characteristics of study sample |      | Significant positive (+) or negative (-) associations with back pain |      |      |                 |                   |                       |        |                                                                                                           |
|---------------------------------------------|-----------|-----|-----|---|--------------------------------------------------|---------------------------------|------|----------------------------------------------------------------------|------|------|-----------------|-------------------|-----------------------|--------|-----------------------------------------------------------------------------------------------------------|
| Reference, (year of pub), country, pop size | MBP       | LBP | Mix | ? | Clear definition of BP (x/4) (Additional file 5) | Age range (mean)                | Sex  | Female                                                               | Male | Age  | Pubertal status | Family history BP | Socioeconomic factors | Height | Significant estimates (95% CI)                                                                            |
| [85] Watson, (2003), Great Britain, 1446    |           | X   |     |   | 3/4                                              | 11-14                           | Both | +                                                                    |      | +    | (NT)            | (NT)              | (NT)                  | (NT)   | Female: 28%, Males 19%<br>Girls 11 yr: 18%, 14 yr: 34%<br>Boys 11 yr: 14%, 14 yr: 25%                     |
| [86] Wedderkopp, (2005), Denmark, 254       | X         | X   | X   |   | 3/4                                              | 8-16                            | Both | (NT)                                                                 | (NT) | (NT) | +               | (NT)              | (NT)                  | (NT)   | Later pubertal status:<br>Stage 1: OR 1 (index)<br>Stage 4: OR 2.0 (1.3-3.5)<br>Stage 5: OR 2.1 (1.1-4.1) |
| [87] Wedderkopp, (2001), Denmark, 806       | X         | X   | X   |   | 3/4                                              | 8-16                            | Both | 0                                                                    | 0    | (NT) | (NT)            | (NT)              | (NT)                  | (NT)   |                                                                                                           |
| [88] Wirth, (2015), Switzerland, 412        | X         | X   | X   |   | 3/4                                              | 10-16                           | Both | 0                                                                    | 0    | +    | (NT)            | 0                 | (NT)                  | (NT)   | Older age: OR 1.3 (1.1-1.7)                                                                               |
| [89] Wirth, (2013), Switzerland, 434        | X         | X   | X   |   | 3/4                                              | 6-16                            | Both | +                                                                    |      | +    | (NT)            | +                 | (NT)                  | (NT)   | Female: OR 1.9 (1.3-3.0)<br>Older age: OR 1.3 (1.2-1.4)<br>Family history: 2.3 (1.2-4.7)                  |
| [90] Yao, (2012), China, 1214               |           | X   |     |   | 3/4                                              | 13-17                           | Both | (NT)                                                                 | (NT) | 0    | (NT)            | +                 | (NT)                  | 0      | Family history: 2.6 (1.9-3.6)                                                                             |

(NT): Not tested, (NR): Included in study but not reported, \*+ significant positive association, \*- significant negative association, 0: tested but non-significant estimate, OR: odds ratio, SE: standard error, PR: prevalence ratio, RR: relative risk
